# Supplementary material for: Chemiluminescence from osmium(ii) complexes with phenanthroline, diphosphine and diarsine ligands
Source: Royal Society of Chemistry journal article supplement (doi:10.1039/c2an35446b), 2012-01-01
Supplement: c2an35446b.pdf [file c2an35446b.pdf]

Electronic Supplementary Information for:

**Chemiluminescence from osmium(II) complexes with phenanthroline, diphosphine and diarsine ligands**

Elizabeth M. Zammit, Gregory J. Barbante, Brenden Carlson, Egan H. Doeven, Neil W. Barnett,

Conor F. Hogan, Mark M Richter and Paul S. Francis\*

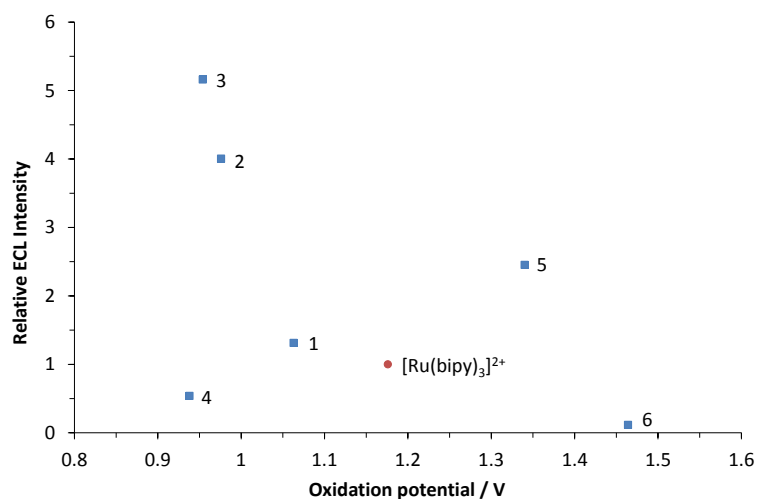

**Fig. S1** Oxidation potential ( $M^{2+/3+}$  vs. Ag/AgCl) of 0.1 mM Os(II) complexes (and  $Ru(bipy)_3^{2+}$ ) plotted against the intensity of the corresponding ECL reaction using ofloxacin as co-reactant ( $1 \times 10^{-5}$  M). Complexes:  $[Os(bthp)_2(dmpe)]^{2+}$  (1),  $[Os(tmep)_2(dchpe)]^{2+}$  (2),  $[Os(tmep)_2(diars)]^{2+}$  (3),  $[Os(tmep)_2(dmpe)]^{2+}$  (4),  $[Os(phen)_2(dppe-ne)]^{2+}$  (5),  $[Os(diars)_2(bthp)]^{2+}$  (6). See Fig. 1 in the paper for full names and structures of the ligands.
